# Supplementary material for: Multi-modal profiling of human fetal liver hematopoietic stem cells reveals the molecular signature of engraftment
Source: PubMed Central journal article supplement (PMC8888592; doi:10.1038/s41467-022-28616-x), 2022-03-01
Supplement: 41467_2022_28616_MOESM2_ESM.pdf [file 41467_2022_28616_MOESM2_ESM.pdf]

## **INVENTORY OF SUPPORTING INFORMATION**

**Supplementary Figure Legends**

**Supplementary Figures**

**Supplementary Table Legends**

**Supplementary Tables**

**Supplementary References**

## SUPPLEMENTARY FIGURE LEGENDS

### Supplementary Fig. 1. Experimental outline and gene expression changes over pseudotime

**a** Overview of fractions isolated from a FL sample and how they were subdivided in individual fractions to be run on the 10X Genomics platform for CITE-seq analysis and simultaneous transplantation experiments. Like the CD34<sup>+</sup> fraction, the CD34<sup>-</sup> flowthrough was first gated to select live cells prior to GYPA gating. At the time of sorting this fraction contained 87% CD34<sup>-</sup> cells and 13% CD34<sup>+</sup> cells. The CD34<sup>+</sup> bulk cells that were live gated after CD34<sup>+</sup> magnetic bead selection contained 97.4% CD34<sup>+</sup> cells and 2.64% CD34<sup>-</sup> cells. The GPI-80<sup>+</sup>CD34<sup>-</sup> cells captured in the GPI-80 sort gate represent macrophages. This population (349 cells) was not considered for the in-depth profiling of the GPI-80<sup>+</sup> fraction which starts from cells captured within the CD34<sup>+</sup> HSC/MPP fraction in **Figure 1a**. **b-e** Pseudotime trajectories per hematopoietic lineage (left) and heatmaps illustrating gene expression changes over pseudotime for HSC/MPP and key lineage markers (right) for the erythroid (**b**), lymphoid (B cell) (**c**), lymphoid (T/NK cell) (**d**) and myeloid (**e**) lineage. Interestingly, GYPA<sup>+</sup> (CD235a) sorting also appeared to enrich for cells with a signature of B cells (**a,c**). While reports of GYPA expression in B cells exist<sup>1</sup>, we did not observe CD235a staining on B cells in subsequent validation experiments on 5 additional FL samples using our multi-parameter flow panel (**Figure 4c**). A difference in concentration of the CD235a antibody between this sort and the multi-parameter flow cytometry experiment might explain the increased likelihood of picking up non-specific or low levels of CD235a signal during the initial sort, resulting in co-purification of B cells in the GYPA<sup>+</sup> gate.

### Supplementary Fig. 2. Dissecting the molecular signature of HSC/MPP cluster 0 cells.

**a** Dot plot illustrating the distribution of a selection of genes enriched in the GPI-80<sup>+</sup> compared to CD34<sup>+</sup> bulk HSCs/MPPs. Scaled average expression is shown. 'Percent expressed' represents the fraction of cells having non-zero expression values. **b** Comparison of *LMNA* expression in prenatal HSPCs versus postnatal HSPCs. We

compared CD34<sup>+</sup> bulk FL HSC/MPPs from this study with existing scRNAseq data sets representing postnatal CD34<sup>+</sup> fractions<sup>2-4</sup> in terms of *LMNA* expression. Scaled average expression is shown in the dot plot. 'Percent expressed' represents the fraction of cells having non-zero expression values. **c** Comparison of expression between HSC-enriched fractions in the FL (this study, GPI-80<sup>+</sup> fraction) and BM (Velten et al., 2017<sup>4</sup>, CD49f<sup>+</sup> gated) for a selection of genes enriched in HSC/MPP cluster 0. Scaled average expression is shown. 'Percent expressed' represents the fraction of cells having non-zero expression values. **d** Regulon Specificity Score (RSS) plot highlighting the top 5 regulons with the highest specificity for HSC/MPP cluster 0 within the GPI-80<sup>+</sup> fraction. **e** Heatmaps illustrating row-scaled average expression of the genes within a regulon for NFE2L2, KLF13 and KLF10 regulons. The scale bar shows row-scaled average expression from 0-Max.

**Supplementary Fig. 3. Dissecting the molecular signature of cells belonging to HSC/MPP cluster 2 and 3.**

**a** Overview of cell cycle distribution for the different HSC/MPP clusters within the GPI-80<sup>+</sup> fraction (left) and the CD34<sup>+</sup>bulk versus GPI-80<sup>+</sup> fraction (right). UMAP representations of cell cycle phase distribution and S and G2/M scores are illustrated below. The scale bar shows scaled expression from 0-Max. **b** EnrichR (<https://maayanlab.cloud/Enrichr>) read-out (-log(p-value)) for HSC/MPP cluster 2 in the GPI-80<sup>+</sup> fraction. Black bars indicate when the FDR is significant with a score of <0.05.

**c** Regulon Specificity Score (RSS) plot highlighting the top 5 regulons with the highest specificity for HSC/MPP cluster 2 within the GPI-80<sup>+</sup> fraction. **d** EnrichR

(<https://maayanlab.cloud/Enrichr>) read-out (-log(p-value)) for HSC/MPP cluster 3 in the GPI-80<sup>+</sup> fraction. Black bars indicate when the FDR is significant with a score of <0.05.

**e** Regulon Specificity Score (RSS) plot highlighting the top 5 regulons with the highest specificity for HSC/MPP cluster 3 within the GPI-80<sup>+</sup> fraction.

**Supplementary Fig. 4. Integration of mRNA and (antibody-derived tag) ADT data identifies CD201 as a marker enriching for highly functional HSCs.**

**a** Comparison of mRNA and ADT expression for a selection of HSC markers in the CD34<sup>+</sup>bulk fraction. The scale bar shows scaled expression from 0-Max. **b** Comparison of mRNA and ADT expression for a selection of HSC markers in the GPI-80<sup>+</sup> fraction. The scale bar shows scaled expression from 0-Max. **c-e** Transcriptomic cluster composition (%) within the CD34<sup>+</sup> bulk fraction upon stepwise enrichment for cell surface marker expression of CD90 (**c**), CD49f (**d**) and ENG (**e**). The x-axis is divided in segments showing the indicated top x% of expression for each marker. **f** Longitudinal engraftment analysis illustrating superior engraftment of CD34<sup>+</sup>CD201<sup>+</sup> compared to all other fractions, including CD34<sup>+</sup>GPI-80<sup>+</sup> cells. Six NSG mice were transplanted per condition with 2500 cells each and engraftment was assessed by determining the percentage (%) of peripheral blood cells expressing human CD45 at weeks 4, 8, 12, 16 and 20. The mean is shown with error bars representing the standard error of the mean. Two-way analysis of variance (ANOVA) was performed with Tukey test to account for multiple comparisons and obtain adjusted p-values: For the 16-week time point, p=0.0014 (\*\*) for CD34<sup>+</sup>CD201<sup>+</sup> vs. CD34<sup>+</sup>GPI-80<sup>+</sup> and p<0.0001 for CD34<sup>+</sup>CD201<sup>+</sup> compared to all other conditions. For the 20-week time point, p<0.0001 (\*\*\*\*) for CD34<sup>+</sup>CD201<sup>+</sup> compared to all other conditions. Source data are provided as a Source Data file. **g** Demonstration of multi-lineage repopulation in mice engrafted with human CD34<sup>+</sup>CD201<sup>+</sup> and CD34<sup>+</sup>GPI-80<sup>+</sup> cells. The average percentages (n=6) of human CD45<sup>+</sup> peripheral blood cells that stain positive for a given lineage marker are shown. Source data are provided as a Source Data file.

**Supplementary Fig. 5. Multi-dimensional flow cytometric characterization across multiple FL samples validates (antibody-derived tag) ADT expression patterns.**

**a** Phenograph analysis showing the distribution of clusters identified in **Figure 4d** over the different FL samples as well as PBMCs. As expected, certain Phenograph clusters were only represented in the PBMC sample as they contained the more mature cell populations. Heat map color indicates percentage of cells per sample allocated to each cluster (the darker the green, the higher the percentage). **b** Phenograph analysis

representing clusters specific to the CD34<sup>+</sup> FL cells. The different cell surface markers assessed in this panel are shown on top. Heat map color indicates median fluorescence intensity of each marker expression per cluster and is normalized per column/marker (the darker the green, the higher the median fluorescence intensity). **c** Overview of the contribution of each FL sample to the combined data set.

### **Supplementary Fig. 6. In silico sorting strategy.**

**a** Outline of *in silico* gating steps as guided by flow cytometry results. The left column shows the initial CD34<sup>+</sup>CD38<sup>-</sup> gating step. The middle column shows the signature-specific gating including the percentages of cells that were gated based on ADT expression data (and GPI-80 score, see Supplementary Methods section). The right column shows representative flow plots for a FL sample as well as the average percentage of cells in each of the gates based on flow cytometric analysis of 5 individual FL samples (<x%>, n=5). **b** Percentage of cells in each gate based on flow cytometric analysis of 5 individual FL samples. The mean is shown with error bars representing the standard error of the mean (n=5). Source data are provided as a Source Data file. **c** Flow plot illustrating the distribution of CD38 surface expression within the CD34<sup>+</sup> fraction of the FL (left) and the GPI-80<sup>+</sup> events in either the CD34<sup>+</sup>CD38<sup>-</sup> gated fraction (middle) or the CD34<sup>+</sup>CD38<sup>+</sup> gated fraction (right) for a representative FL sample. **d** Quantification of percentage CD38<sup>+</sup> cells in the CD34<sup>+</sup> fraction by flow cytometry. Source data are provided as a Source Data file. The mean is shown with error bars representing the standard error of the mean (n=5). **e** VNN2 mRNA expression in the GPI-80<sup>+</sup> fraction. **f** Flow cytometry data (left) compared to a similar representation of the CITE-seq data (right) based on ADT expression for CD34 (y-axis) and the GPI-80<sup>+</sup> score (x-axis) (see Methods). One outlier cell with very high CD34 ADT expression (> 6) was excluded from the CITE-seq data (right).

### **Supplementary Fig. 7. Data quality assessment of CITE-seq experiment.**

**a** Violin plots showing the total number of gene counts per cell for the fractions CD34<sup>-</sup>GYPA<sup>-</sup>, CD34<sup>-</sup>GYPA<sup>+</sup>, CD34<sup>+</sup> bulk, and GPI-80<sup>+</sup>. Red dotted lines indicate medians. **b** Violin plots showing the total number of detected genes per cell for the four profiled FL

fractions. **c** Violin plots showing the levels of contamination estimated by DecontX for the four profiled FL fractions.

a

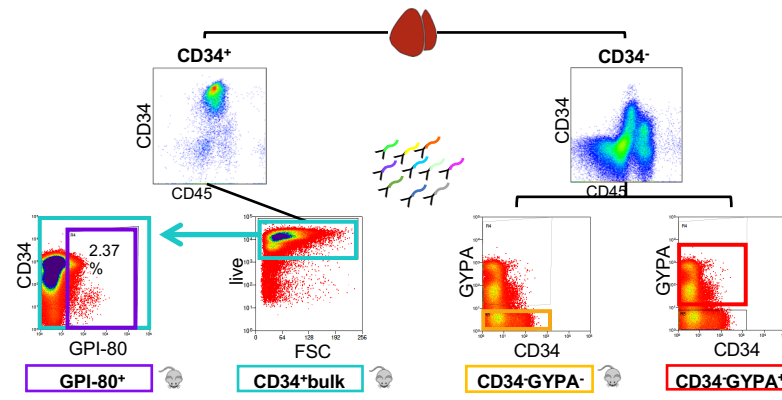

b

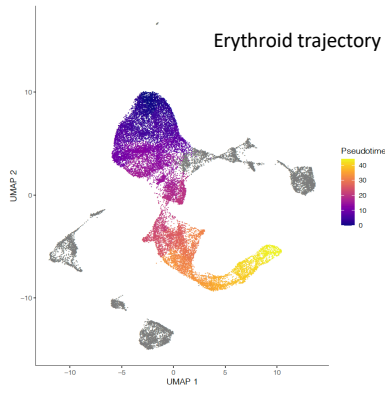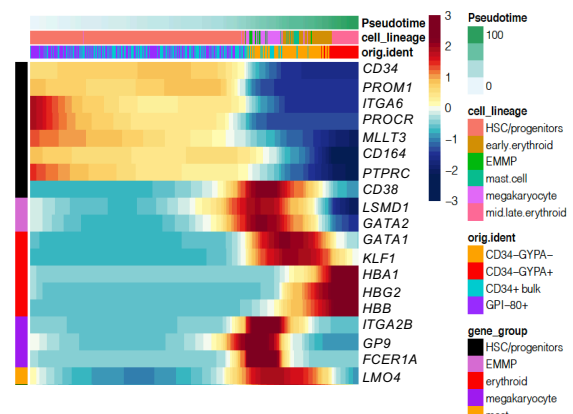

c

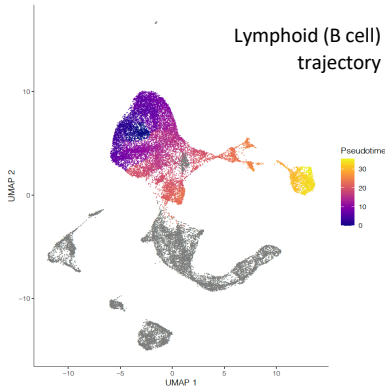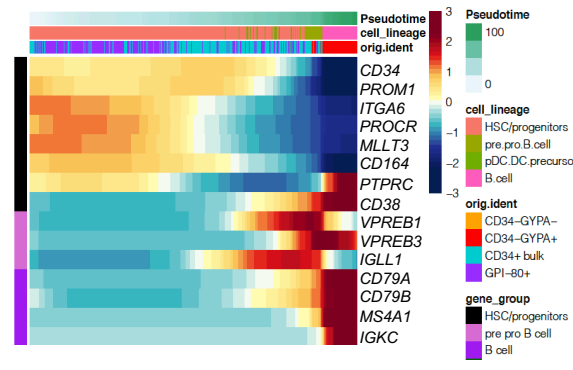

d

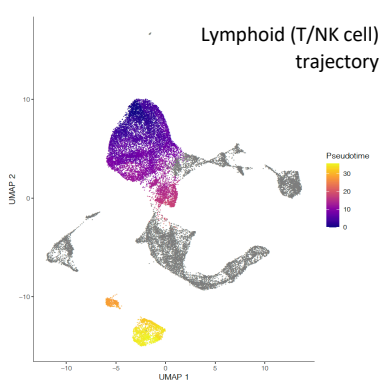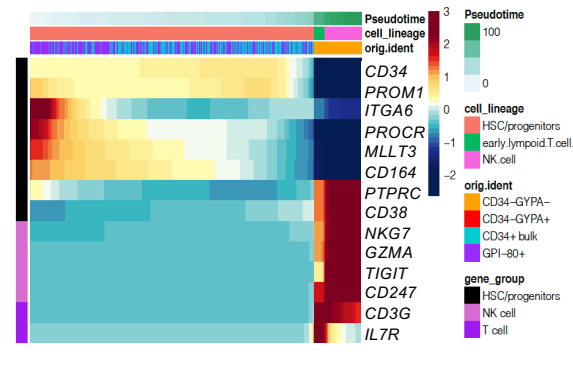

e

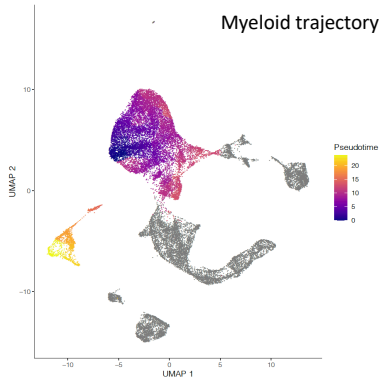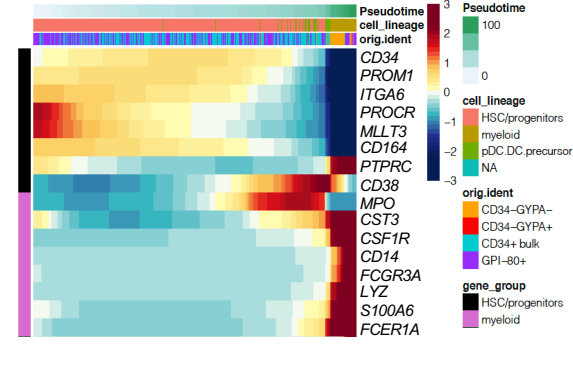

Figure S2

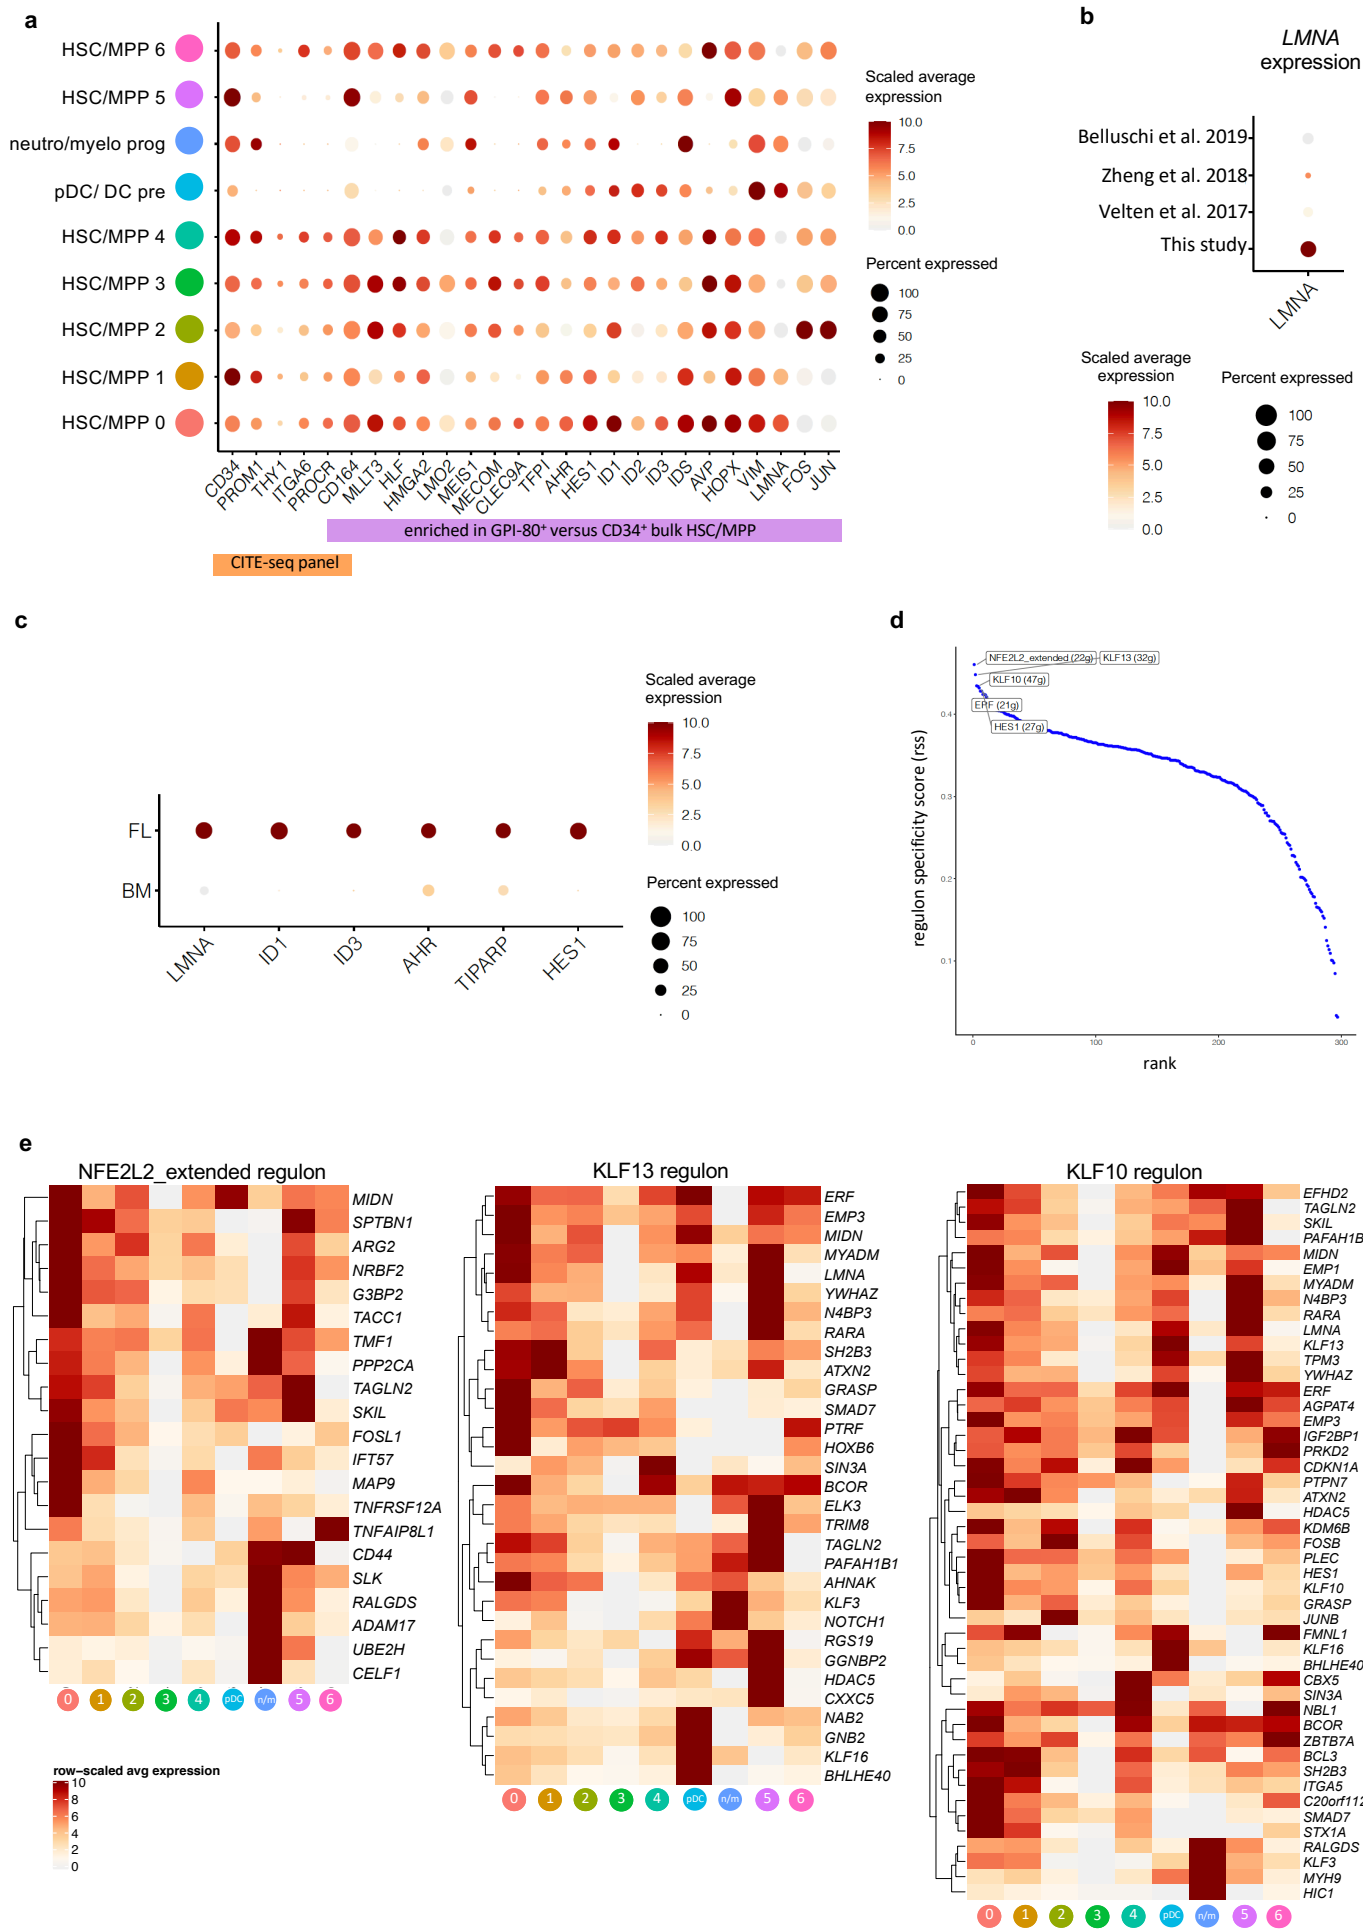



Figure S3

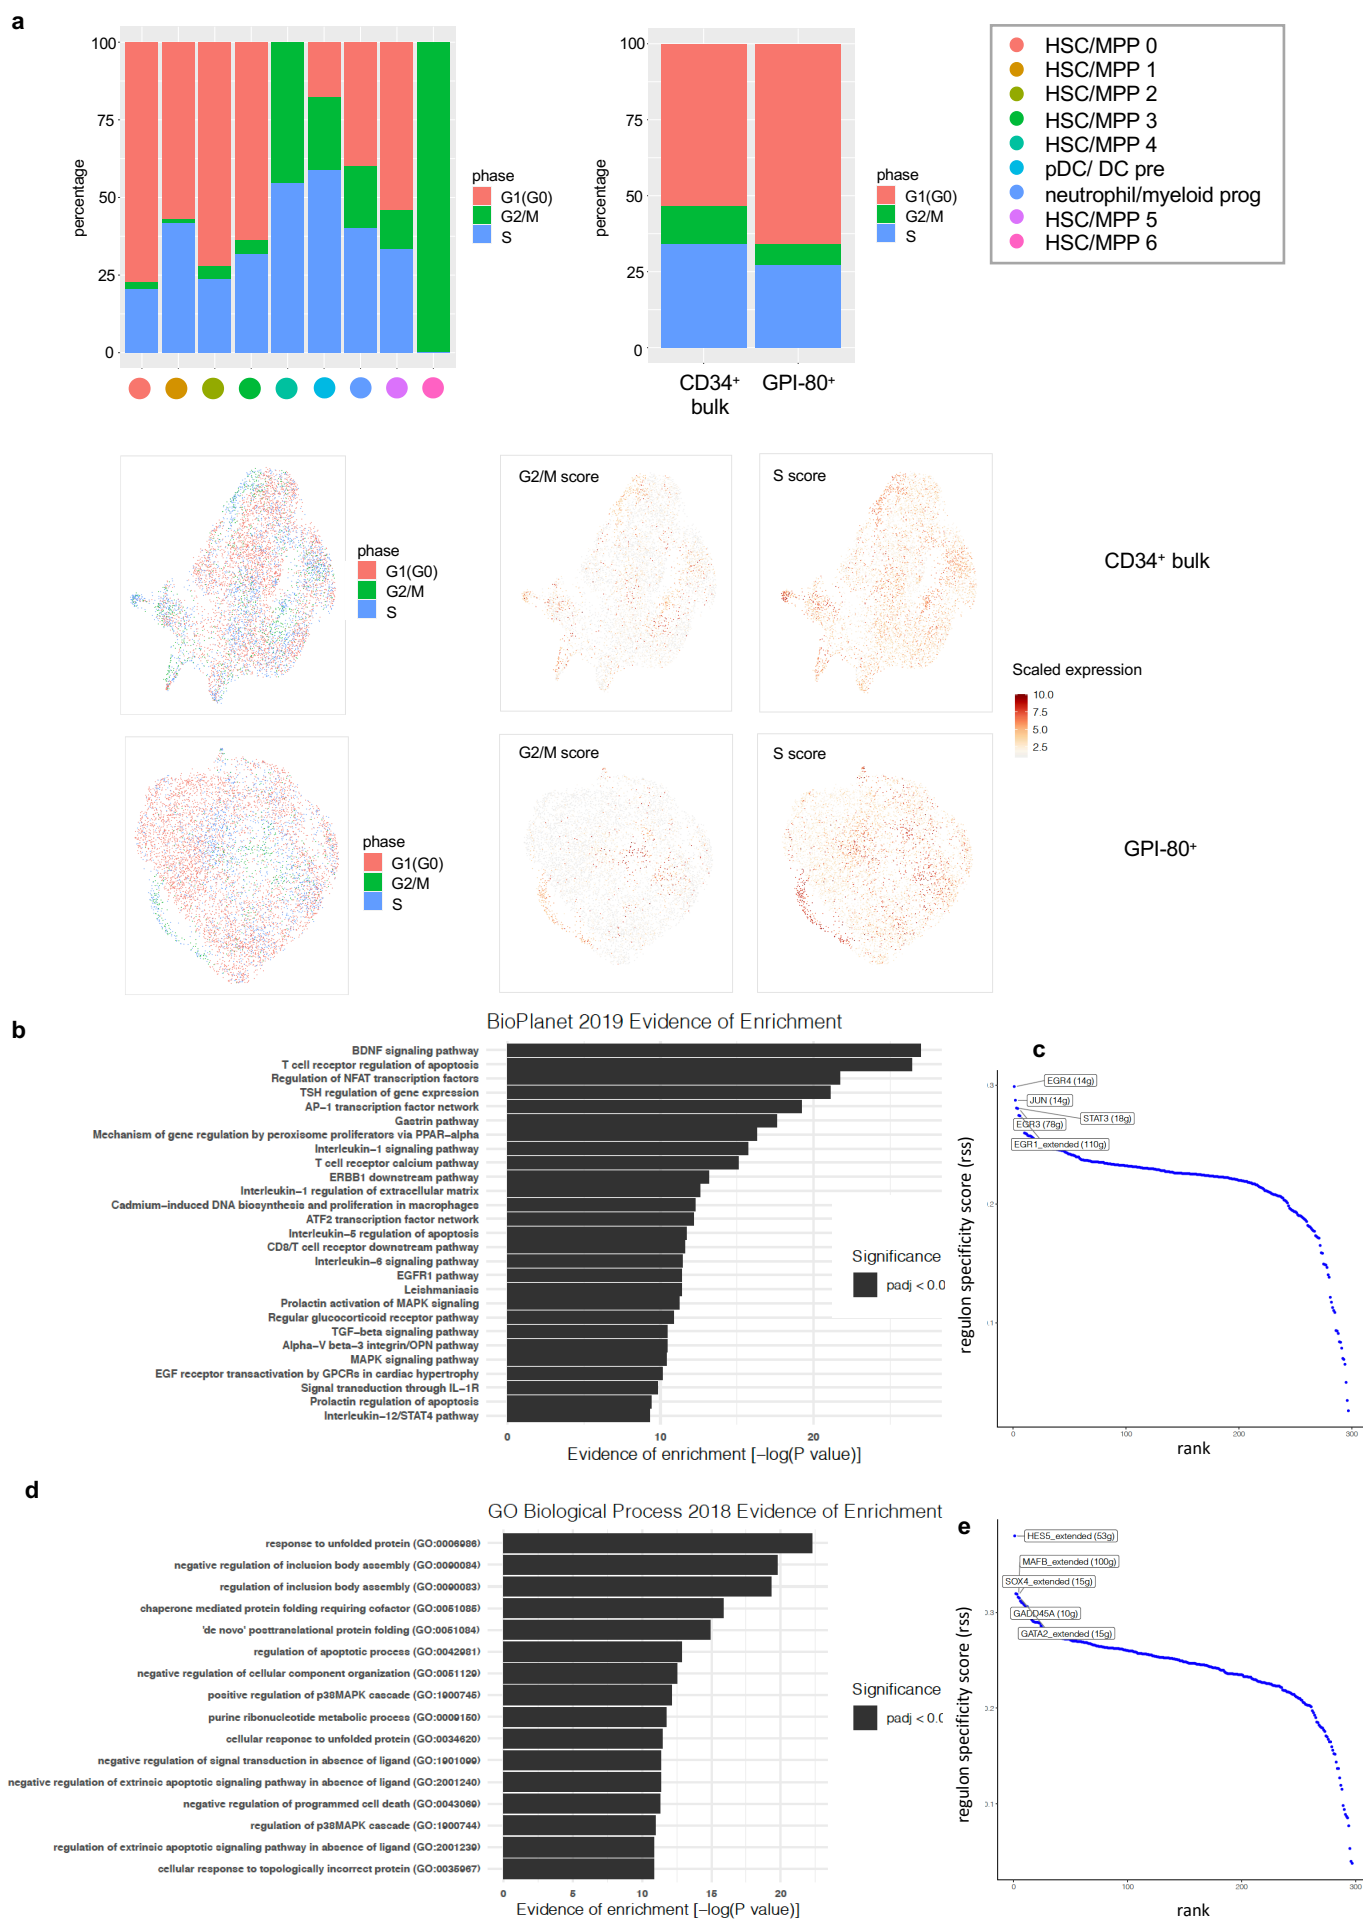

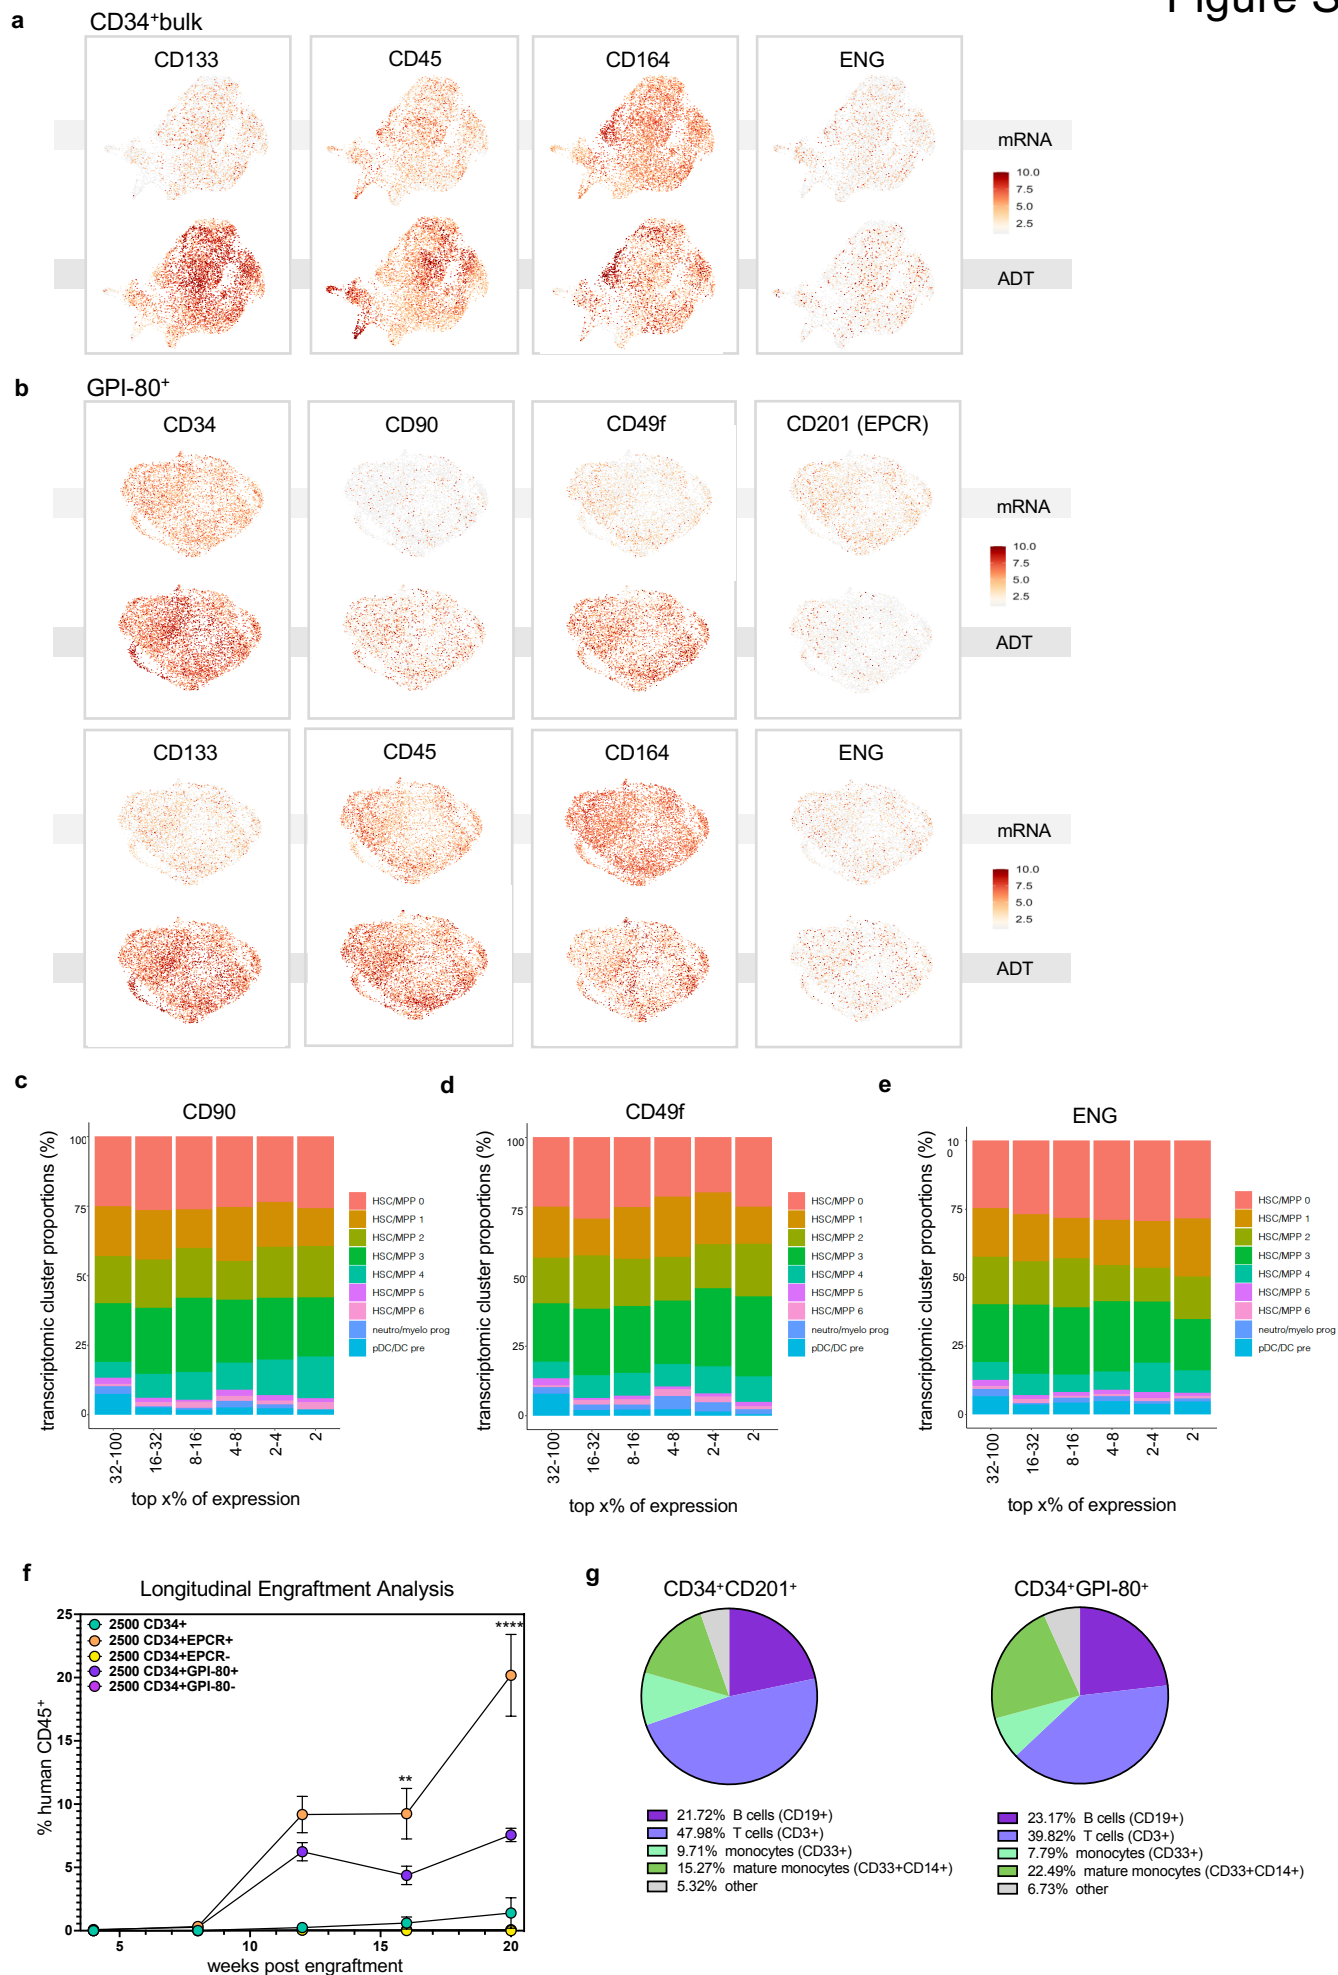

Figure S5

a

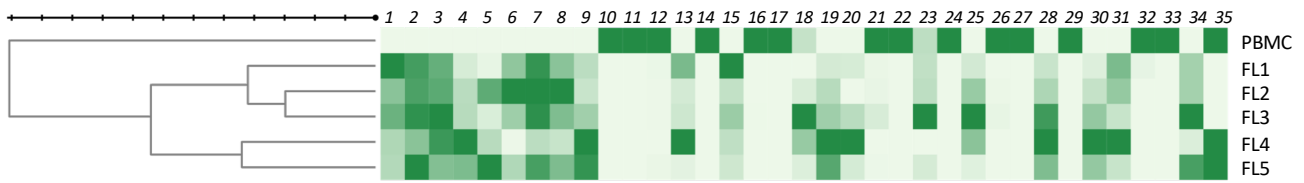

b

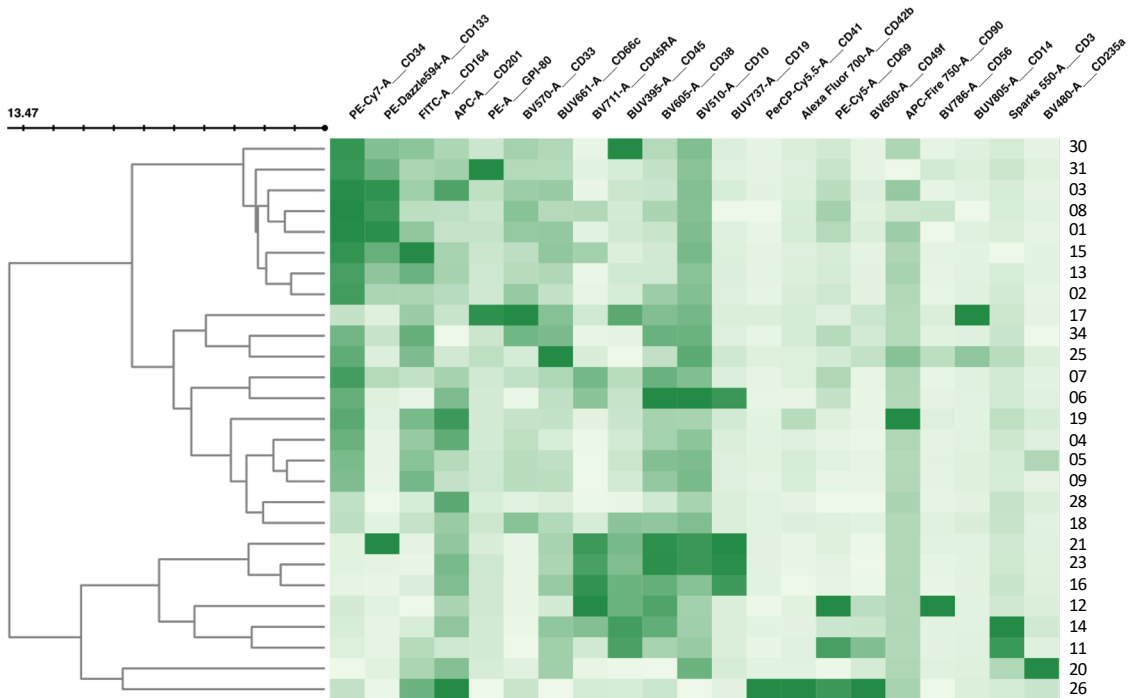

c

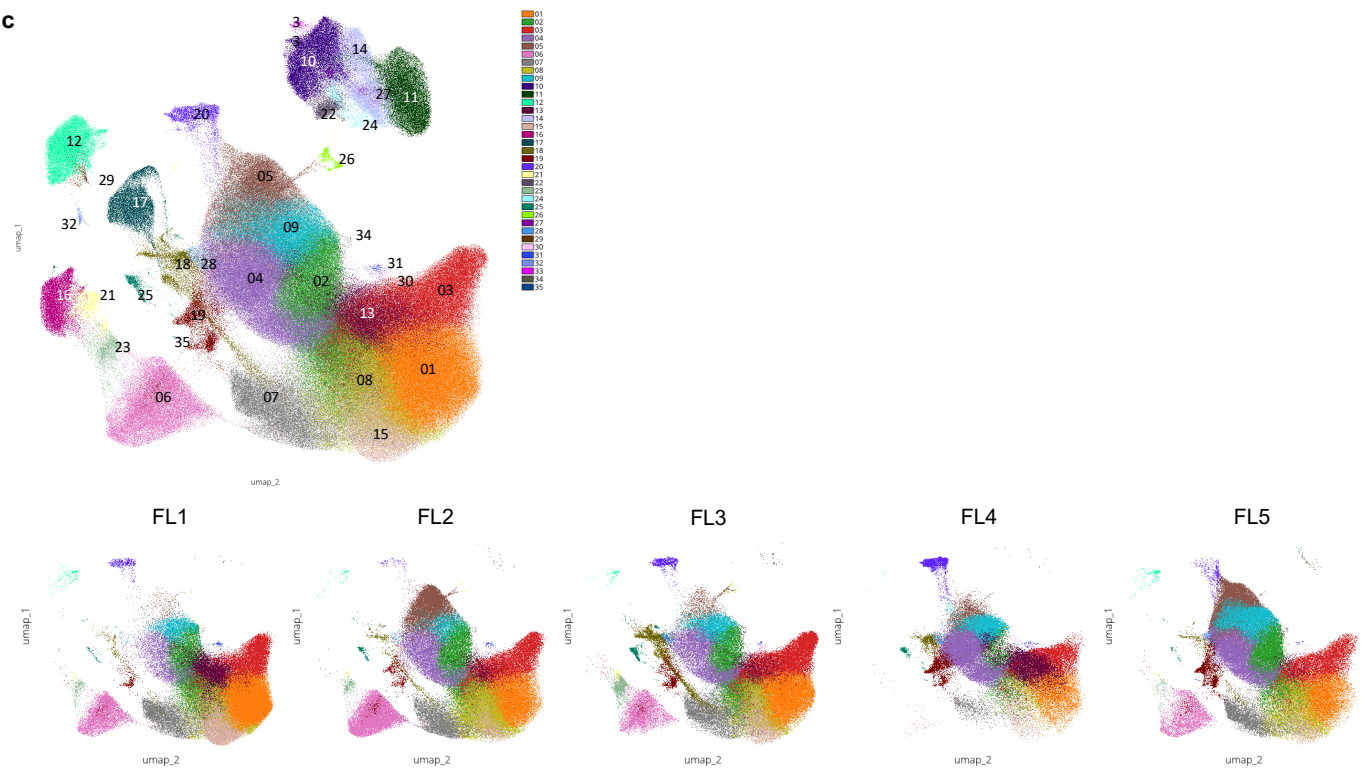

# Figure S6

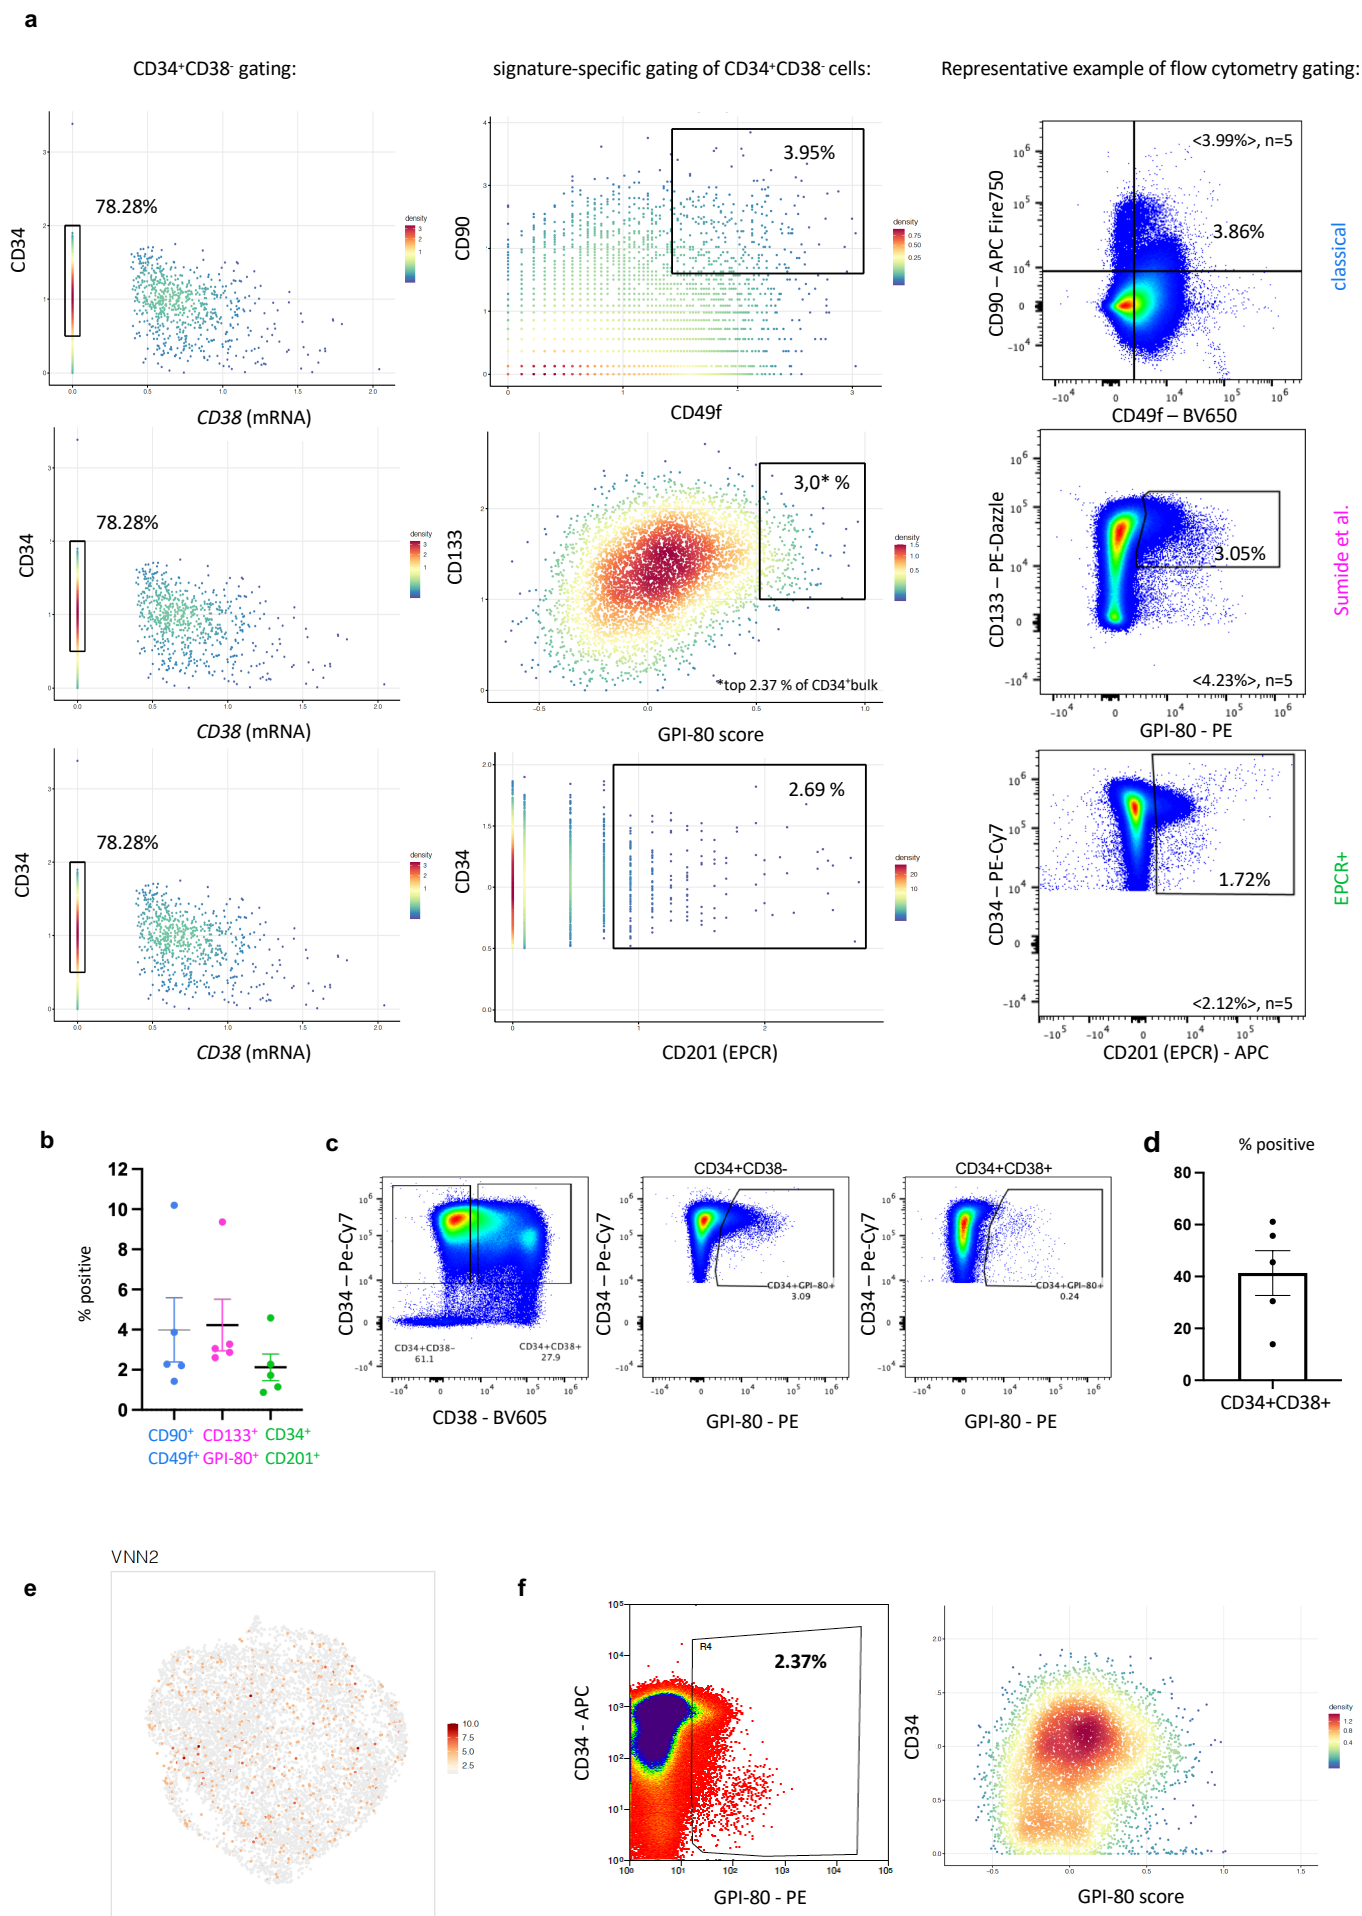

Figure S7

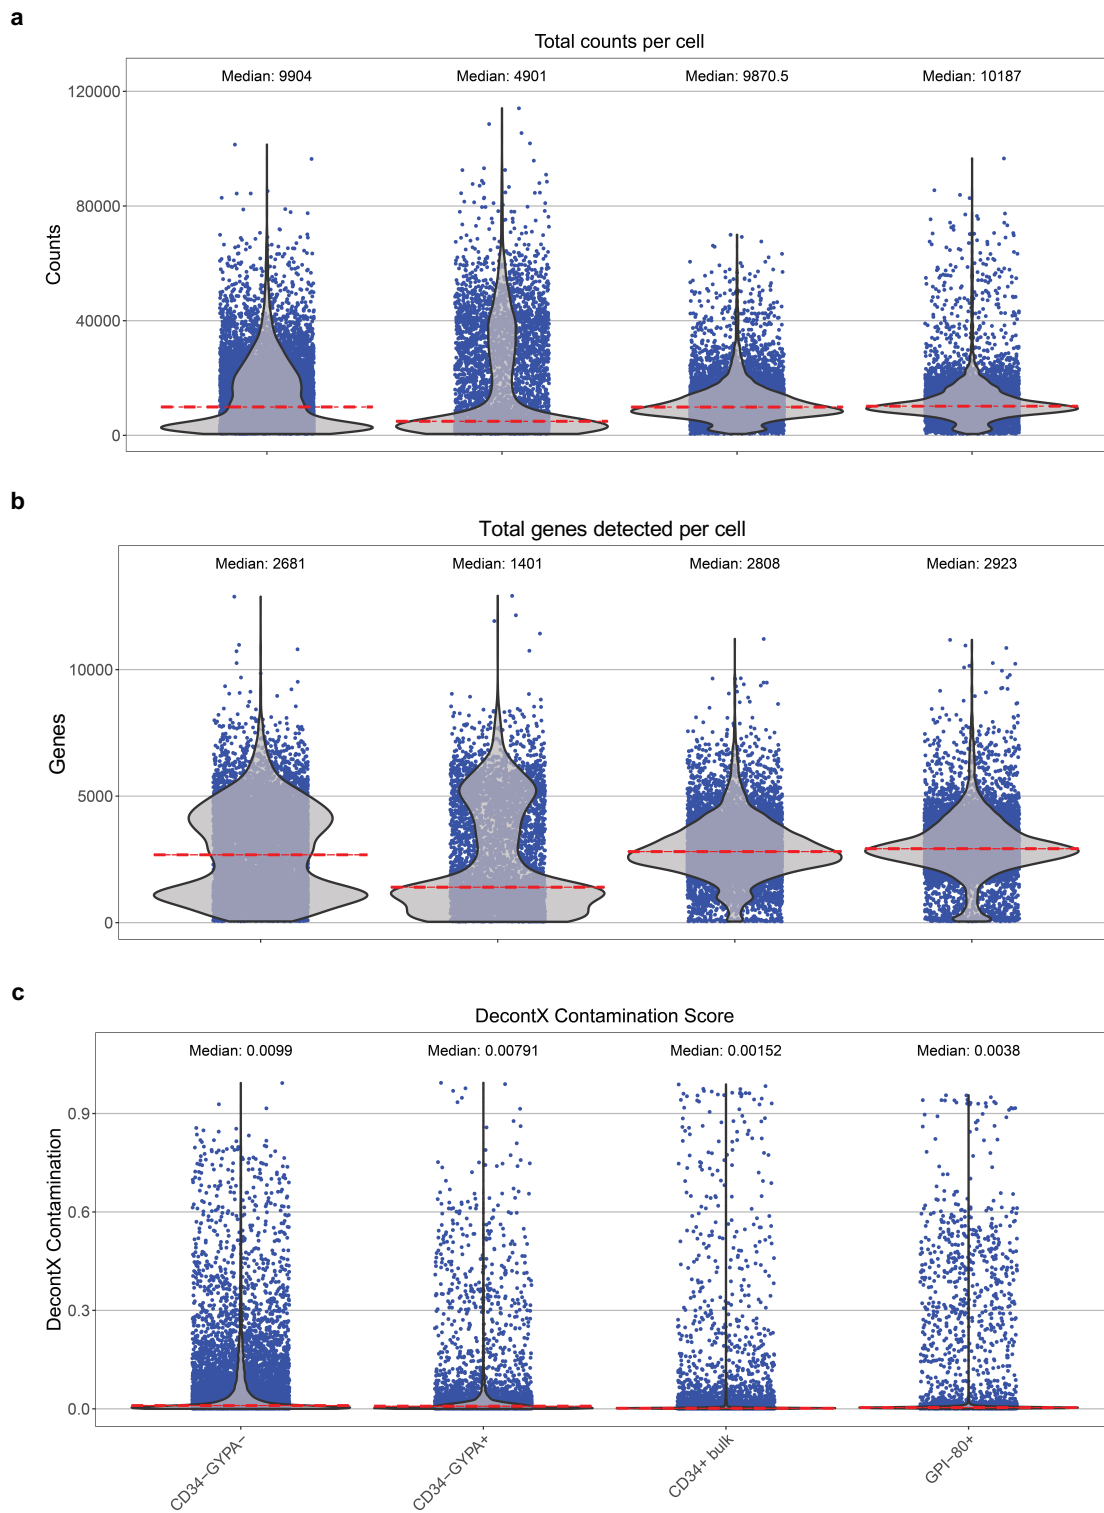

## **SUPPLEMENTARY TABLE LEGENDS**

### **Supplementary Table 1. Oligo-tagged antibodies used in CITE-Seq**

The antibodies included in this panel consist of known markers relevant to characterize HSCs and other candidates identified in a pilot experiment.

### **Supplementary Table 2. Differentially expressed genes (DEGs) between GPI-80<sup>+</sup> and CD34<sup>+</sup> bulk HSCs/MPPs**

P-values were generated by MAST (wrapped in Seurat), which uses a two-sided likelihood ratio test. P-values were adjusted for multiple comparisons using a bonferroni correction based on the total number of genes in the dataset.

### **Supplementary Table 3. Differentially expressed genes (DEGs) between clusters within the GPI-80<sup>+</sup> fraction**

P-values were generated by MAST (wrapped in Seurat), which uses a two-sided likelihood ratio test. P-values were adjusted for multiple comparisons using a bonferroni correction based on the total number of genes in the dataset.

### **Supplementary Table 4. Top enriched genes per cluster in the different HSC/ MPP fractions in Figures 2c-e**

The rank is indicated behind the genes and the bolded gene names were selected for labeling of the different clusters in **Figure 2e**.

### **Supplementary Table 5. Multi-dimensional flow cytometry panel antibodies**

**Supplementary Table 1. Oligo-tagged antibodies used in CITE-Seq**

| Cell surface marker | Gene                      | Vendor    | Cat #  | Concentration |
|---------------------|---------------------------|-----------|--------|---------------|
| CD34                | <i>CD34</i>               | BioLegend | 343537 | 1ug in 100ul  |
| CD38                | <i>CD38</i>               | BioLegend | 303541 | 1ug in 100ul  |
| CD90                | <i>THY1</i>               | BioLegend | 328135 | 1ug in 100ul  |
| CD45                | <i>PTPRC</i>              | BioLegend | 304064 | 1ug in 100ul  |
| CD49f               | <i>ITGA6</i>              | BioLegend | 313633 | 1ug in 100ul  |
| CD133               | <i>PROM1</i>              | BioLegend | 372815 | 1ug in 100ul  |
| CD201               | <i>EPCR/PROCR</i>         | BioLegend | 351907 | 1ug in 100ul  |
| CD164               | <i>CD164</i>              | BioLegend | 324809 | 1ug in 100ul  |
| CD105               | <i>ENG</i>                | BioLegend | 323221 | 1ug in 100ul  |
| CD144               | <i>CDH5/VECAD</i>         | BioLegend | 348517 | 1ug in 100ul  |
| CD202b              | <i>TEK/TIE2</i>           | BioLegend | 334213 | 1ug in 100ul  |
| VEGFR3              | <i>FLT4</i>               | BioLegend | 356207 | 1ug in 100ul  |
| CLEC1B              | <i>CLEC1B</i>             | BioLegend | 372009 | 1ug in 100ul  |
| CD31                | <i>PECAM1</i>             | BioLegend | 303137 | 1ug in 100ul  |
| CD184               | <i>CXCR4</i>              | BioLegend | 306531 | 1ug in 100ul  |
| HLA-DR,DP,DQ        | <i>HLA class II genes</i> | BioLegend | 307659 | 1ug in 100ul  |
| pan-HLA class I     | <i>HLA class I genes</i>  | BioLegend | 311445 | 1ug in 100ul  |
| CD141               | <i>THBD</i>               | BioLegend | 344121 | 1ug in 100ul  |
| CD235a              | <i>GYPA</i>               | BioLegend | 349117 | 1ug in 100ul  |

**Supplementary Table 4. Top enriched genes in HSC/MPP clusters across samples**

| cluster                       | HSC/MPP (Figure 2C)                                      | CD34+ bulk (Figure 2D)               | GPI-80+ (Figure 2E)                  |
|-------------------------------|----------------------------------------------------------|--------------------------------------|--------------------------------------|
| HSC/MPP 0                     | ID1 (1), VIM (2), RGCC (3), <b>LMNA (4)</b>              | RGCC (1), <b>LMNA (2)</b>            | RGCC (1), <b>LMNA (2)</b>            |
| HSC/MPP 1                     | <b>CDK6 (1)</b>                                          | IGLL1 (1), HCST (2), <b>CDK6 (3)</b> | IGLL1 (1), HCST (2), <b>CDK6 (3)</b> |
| HSC/MPP 2                     | <b>FOS (1), JUN (2)</b>                                  | <b>FOS (1), JUN (2)</b>              | <b>FOS (1), JUN (2)</b>              |
| HSC/MPP 3                     | HSPA1A (1), <b>HSPA1B (2)</b>                            | HSPA1A (1), <b>HSPA1B (2)</b>        | <b>HSPA1B (1)</b> , HSPA1A (2)       |
| HSC/MPP 4                     | <b>HIST1H4C (1)</b>                                      | <b>HIST1H4C (1)</b>                  | <b>HIST1H4C (1)</b>                  |
| pDC/ DC pre                   | <b>IGLL1 (1)</b> , LTB (2), IGJ (3)                      | <b>IGLL1 (1)</b> , LTB (2), IGJ (3)  | <b>IGLL1 (1)</b> , LTB (2), IGJ (3)  |
| neutrophil/myeloid progenitor | <b>MPO (1)</b> , PRTN3 (2), AZU1 (3), LFD (4), IGLL1 (5) | IGLL1 (1), <b>MPO (2)</b>            | IGLL1 (1), <b>MPO (2)</b>            |
| HSC/MPP 5                     | <b>PRSS3P1 (1)</b>                                       | <b>PRSS3P1 (1)</b>                   | <b>PRSS3P1 (1)</b>                   |
| HSC/MPP 6                     | <b>CENPF (1)</b> , TOP2A (2)                             | <b>CENPF (1)</b> , TOP2A (2)         | <b>CENPF (1)</b> , TOP2A (2)         |

**Supplementary Table 5. Multi-dimensional flow cytometry panel antibodies**

| <b>marker</b> | <b>Fluorophore</b>   | <b>Vendor</b>     | <b>Cat #</b> | <b>Dilution</b> |
|---------------|----------------------|-------------------|--------------|-----------------|
| CD45          | BUV395               | BD Biosciences    | 563791       | 1:100           |
| Live/dead     | fixable UV live/dead | Thermo Fischer    | L34961       | 1:800           |
| CD66c         | BUV661               | BD Biosciences    | 741653       | 1:50            |
| CD19          | BUV737               | BD Biosciences    | 612757       | 1:100           |
| CD14          | BUV805               | BD Biosciences    | 612902       | 1:50            |
| CD235a        | Pacific Blue         | BD Biosciences    | 746358       | 1:400           |
| CD10          | BV510                | BioLegend         | 312219       | 1:50            |
| CD33          | BV570                | BioLegend         | 303417       | 1:400           |
| CD38          | BV605                | BioLegend         | 303532       | 1:50            |
| CD49f         | BV650                | BD Biosciences    | 563706       | 1:200           |
| CD45RA        | BV711                | BioLegend         | 304137       | 1:100           |
| CD56          | BV786                | BD Biosciences    | 564058       | 1:100           |
| CD164         | FITC                 | BioLegend         | 324805       | 1:50            |
| CD3           | Spark Blue 550       | BioLegend         | 100259       | 1:100           |
| GPI-80        | PE                   | MBL International | D087-5       | 1:50            |
| CD133         | PE-Dazzle 594        | BioLegend         | 372811       | 1:100           |
| CD41          | PerCP-Cy55           | BioLegend         | 303719       | 1:100           |
| CD69          | PE-Cy5               | BioLegend         | 310907       | 1:25            |
| CD34          | PE-Cy7               | BioLegend         | 343515       | 1:100           |
| CD201 (EPCR)  | APC                  | BioLegend         | 351906       | 1:25            |
| CD42b         | Alexa 700            | BioLegend         | 303927       | 1:25            |
| CD90          | APC-Fire750          | BioLegend         | 328137       | 1:25            |



## SUPPLEMENTARY REFERENCES

1. Monaco, G. *et al.* RNA-Seq Signatures Normalized by mRNA Abundance Allow Absolute Deconvolution of Human Immune Cell Types. *Cell Rep* **26**, 1627-1640 e1627 (2019).
2. Zheng, S., Papalexi, E., Butler, A., Stephenson, W. & Satija, R. Molecular transitions in early progenitors during human cord blood hematopoiesis. *Mol Syst Biol* **14**, e8041 (2018).
3. Belluschi, S. *et al.* Myelo-lymphoid lineage restriction occurs in the human haematopoietic stem cell compartment before lymphoid-primed multipotent progenitors. *Nat Commun* **9**, 4100 (2018).
4. Velten, L. *et al.* Human haematopoietic stem cell lineage commitment is a continuous process. *Nat Cell Biol* **19**, 271-281 (2017).
